# Supplementary material
Source: publisher figshare collection journal article supplement (https://acs.figshare.com/ndownloader/files/24147046)
Supplement: Supplementary file 1 [file 24147046]

## SUPPORTING INFORMATION

### Targeted Delivery of Antibiotic Therapy to Inhibit *Pseudomonas aeruginosa* using Lipid Coated Mesoporous Silica Core-Shell Nanoassembly

Kavini Rathnayake, Unnati Patel, Chi Pham, Anna McAlpin, Travis Budislich, Surangi N. Jayawardena\*

Department of Chemistry, The University of Alabama in Huntsville, Huntsville, AL 35899

#### Synthesis of Col@MSN@LL-(PAB)

PAB was conjugated to the liposomes by EDC activation chemistry. Liposomes containing DSPE-PEG (2000) CA ( $2.25 \times 10^{-1}$  mmol) were activated with EDC (2.25 mmol) and sulfo-NHS (5.6 mmol) for 2 h at 37 °C. Thereafter, PAB (1 mg) was added to the activated liposomes in a molar ratio of 1:10. The mixture was incubated for 24 h at 37 °C. At the end of the incubation period, PAB-modified liposomes (LL-(PAB)) were purified by centrifugation at 12000 rpm for 30 min at 4 °C and resuspended in PBS (pH 7.4). The purified product was lyophilized and stored at -20 °C until further use. To prepare PAB tagged liposome coated Col@MSN (Col@MSN@LL-(PAB)), 50 mg of Col@MSN was resuspended in PAB modified liposomes (LL-(PAB)) (2 mL) in PBS and mixed for 20 min on an ice bath. Col@MSN@LL-(PAB) particles were separated from empty liposomes by centrifugation at 12000 rpm for 5 min and repeated (3x) washing in PBS. The resultant Col@MSN@LL-(PAB) was lyophilized and dried at -20 °C until further use.

Table S1. Hydrodynamic size, dried size distribution and the zeta potential of nanoassemblies

| Material              | Hydrodynamic diameter (nm) from DLS | Diameter from TEM (nm) | Zeta potential (mV) |
|-----------------------|-------------------------------------|------------------------|---------------------|
| SNP                   | 98 ± 4 (PDI 0.1)                    | N/A                    | -38 ± 2.3           |
| Col@SNP               | 101 ± 2.1 (PDI 0.2)                 | N/A                    | -8 ± 0.8            |
| MSN                   | 300 ± 9 (PDI 0.4)                   | 80 ± 9                 | -30 ± 1.5           |
| Col@MSN               | 380 ± 7.9 (PDI 0.5)                 | 85 ± 5                 | +5.0 ± 1.1          |
| Col@MSN@LL            | 500 ± 9.6 (PDI 0.5)                 | 98 ± 1.6               | +2.5 ± 1.2          |
| Col@MSN@LL-<br>(LL37) | 620 ± 10.6 (PDI 0.7)                | 125 ± 3.4              | +10.2 ± 2.9         |
| Colistin (Col)        | N/A                                 | N/A                    | +10 ± 0.9           |

Table S2. Table of surface area, pore volume and pore size data of MSN and Col@MSN from BET analysis

|                               | MSN                          | Col@MSN                      |
|-------------------------------|------------------------------|------------------------------|
| Surface area (MultiPoint BET) | 8.808e+02 m <sup>2</sup> /g  | 6.464e+02 m <sup>2</sup> /g  |
| Pore volume (BJH method)      | 2.416e+00 cm <sup>3</sup> /g | 1.372e+00 cm <sup>3</sup> /g |
| Pore size (BJH method)        | 1.809e+01 Å                  | 1.181e+01 Å                  |

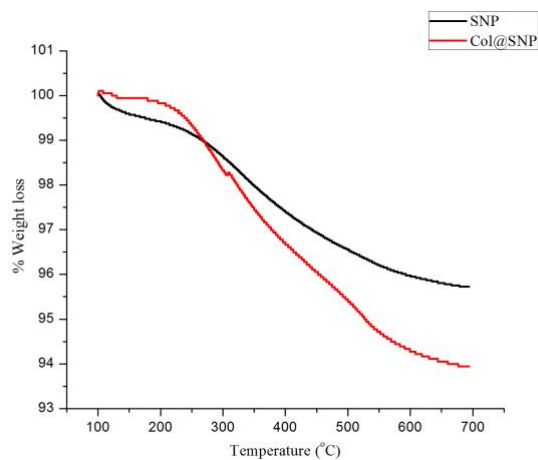

Figure S1. TGA curve for SNP and Col@SNP

Equation S1. Equations used for the calculations of EE% and LC%.

$$EE\% = \frac{\text{total mass of drug added} - \text{mass of unencapsulated drug}}{\text{total mass of drug added}} \times 100$$

$$LC\% = \frac{\text{total mass of drug added} - \text{mass of unencapsulated drug}}{\text{total mass of MSNs}} \times 100$$

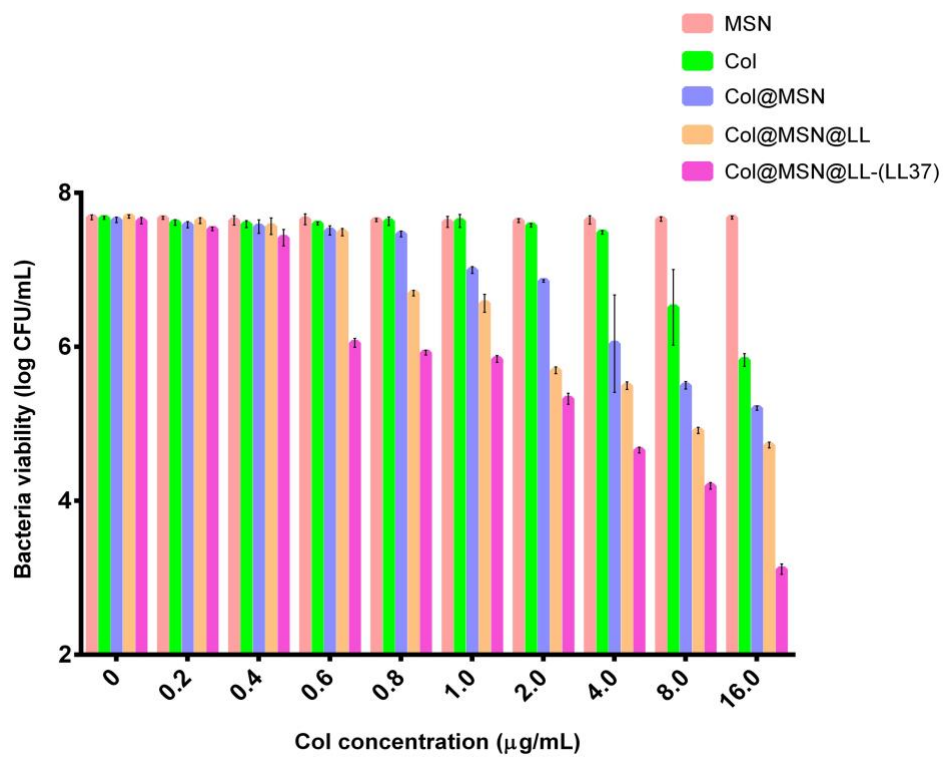

Figure S2. Quantitative antibacterial tests were performed against the PA14 on 96-well plates containing a standard Col concentration in each and every nanoassembly.
